# Supplementary material for: Sex ratios at birth among second-generation mothers of South Asian ethnicity in Ontario, Canada: a retrospective population-based cohort study
Source: PubMed Central journal article supplement — J Epidemiol Community Health. 2018 Jun 21;72(11):1044–51. doi: 10.1136/jech-2018-210622 (PMC6227816; doi:10.1136/jech-2018-210622), 2018-06-21
Supplement: jech-2018-210622supp001.pdf [file jech-2018-210622supp001.pdf]

**Supplementary Table 1:** 2<sup>nd</sup> and 1<sup>st</sup> Generation mothers of South Asian ethnicity and Canadian-born mothers - frequencies of male and female births (M/F) and sex ratios (M:F) with 95% confidence intervals for live births with no previous abortions at and least one previous abortion stratified by sex of the preceding live birth

| Sex of preceding live birth(s)                                                                        | No Previous Abortions |                  | ≥ 1 Previous Abortion |                  |
|-------------------------------------------------------------------------------------------------------|-----------------------|------------------|-----------------------|------------------|
|                                                                                                       | n M/F                 | M:F (95% CI)     | n M/F                 | M:F (95% CI)     |
| <i>2<sup>nd</sup> Generation - South Asian Ethnicity, Canadian-born (N=10,273)</i>                    |                       |                  |                       |                  |
| No previous birth                                                                                     | 2317/2148             | 1.08 (1.02-1.14) | 652/650               | 1.00 (0.90-1.12) |
| 1 girl                                                                                                | 817/797               | 1.03 (0.93-1.13) | 57/53                 | 1.08 (0.74-1.56) |
| 1 boy                                                                                                 | 851/821               | 1.04 (0.94-1.14) | 79/79                 | 1.00 (0.73-1.37) |
| 2 girls                                                                                               | 123/128               | 0.96 (0.75-1.23) | 28/10                 | 2.80 (1.36-5.76) |
| 2 boys                                                                                                | 111/134               | 0.83 (0.64-1.07) | 11/20                 | 0.55 (0.26-1.15) |
| 1 girl, 1 boy                                                                                         | 163/167               | 0.98 (0.79-1.21) | 26/31                 | 0.84 (0.50-1.41) |
| <i>1<sup>st</sup> Generation - South Asian Ethnicity, born in South Asian Countries (N=36,687)</i>    |                       |                  |                       |                  |
| No previous birth                                                                                     | 9544/9352             | 1.02 (0.99-1.05) | 920/864               | 1.06 (0.97-1.17) |
| 1 girl                                                                                                | 2834/2748             | 1.03 (0.98-1.09) | 592/508               | 1.17 (1.04-1.31) |
| 1 boy                                                                                                 | 2757/2576             | 1.07 (1.01-1.13) | 530/459               | 1.15 (1.02-1.31) |
| 2 girls                                                                                               | 553/389               | 1.42 (1.25-1.62) | 231/94                | 2.46 (1.93-3.12) |
| 2 boys                                                                                                | 225/243               | 0.93 (0.77-1.11) | 64/44                 | 1.45 (0.99-2.14) |
| 1 girl, 1 boy                                                                                         | 495/428               | 1.16 (1.02-1.32) | 121/116               | 1.04 (0.81-1.35) |
| <i>1<sup>st</sup> Generation - South Asian Ethnicity, born in non-South Asian Countries (N=4,819)</i> |                       |                  |                       |                  |
| No previous birth                                                                                     | 1056/1016             | 1.04 (0.95-1.13) | 342/337               | 1.01 (0.87-1.18) |
| 1 girl                                                                                                | 358/344               | 1.04 (0.90-1.21) | 78/58                 | 1.34 (0.96-1.89) |
| 1 boy                                                                                                 | 347/345               | 1.01 (0.87-1.17) | 66/56                 | 1.18 (0.83-1.68) |
| 2 girls                                                                                               | 42/54                 | 0.78 (0.52-1.16) | */*                   | *                |
| 2 boys                                                                                                | 51/52                 | 0.98 (0.67-1.44) | 9/13                  | 0.69 (0.30-1.62) |
| 1 girl, 1 boy                                                                                         | 64/86                 | 0.74 (0.54-1.03) | 23/13                 | 1.77 (0.90-3.49) |
| <i>South Asian Ethnicity, unknown generation and birthplace (N=7,880)</i>                             |                       |                  |                       |                  |
| No previous birth                                                                                     | 2117/2046             | 1.03 (0.97-1.10) | 217/240               | 0.90 (0.75-1.09) |
| 1 girl                                                                                                | 599/547               | 1.10 (0.98-1.23) | 84/85                 | 0.99 (0.73-1.34) |
| 1 boy                                                                                                 | 511/565               | 0.90 (0.80-1.02) | 98/90                 | 1.09 (0.82-1.45) |
| 2 girls                                                                                               | 119/79                | 1.51 (1.13-2.00) | 32/14                 | 2.29 (1.22-4.28) |
| 2 boys                                                                                                | 55/64                 | 0.86 (0.60-1.23) | 16/8                  | 2.00 (0.86-4.67) |
| 1 girl, 1 boy                                                                                         | 107/118               | 0.91 (0.70-1.18) | 37/32                 | 1.16 (0.72-1.86) |
| <i>Canadian – Non-South Asian Ethnicity, Canadian-born (N=930,982)</i>                                |                       |                  |                       |                  |
| No previous birth                                                                                     | 219719/209046         | 1.05 (1.04-1.06) | 43409/41743           | 1.04 (1.03-1.05) |
| 1 girl                                                                                                | 74504/71652           | 1.04 (1.03-1.05) | 5544/5385             | 1.03 (0.99-1.07) |
| 1 boy                                                                                                 | 79982/74693           | 1.07 (1.06-1.08) | 5824/5480             | 1.06 (1.02-1.10) |
| 2 girls                                                                                               | 11637/11110           | 1.05 (1.02-1.08) | 908/910               | 1.00 (0.91-1.09) |
| 2 boys                                                                                                | 13643/12562           | 1.09 (1.06-1.11) | 988/969               | 1.02 (0.93-1.11) |
| 1 girl, 1 boy                                                                                         | 19516/18258           | 1.07 (1.05-1.09) | 1759/1741             | 1.01 (0.95-1.08) |

\*suppressed due to counts < 5
